# Supplementary material for: Immunochemical characterization on pathological oligomers of mutant Cu/Zn-superoxide dismutase in amyotrophic lateral sclerosis
Source: Springer Nature journal article supplement (doi:10.1186/s13024-016-0145-9), 2017-01-05
Supplement: MOESM1 [file 11981900]

**Table S1 Information on human cases examined in this study**

| Case  | Diagnosis                    | Mutation   | Disease duration (years) | First neurological symptom              |
|-------|------------------------------|------------|--------------------------|-----------------------------------------|
| III-4 | Familial ALS                 | SOD1 C111Y | 69                       | Weakness in the upper limb              |
| III-5 | Familial ALS                 | SOD1 C111Y | 1.2                      | Weakness in the right leg               |
| IV-6  | Familial ALS                 | SOD1 C111Y | 4                        | Weakness in the right hand              |
| sALS1 | Sporadic ALS                 | N/A        | 1.8                      | Weakness in the lower limb              |
| sALS2 | Sporadic ALS                 | N/A        | 2.8                      | Involuntary bend in the left upper limb |
| sALS3 | Sporadic ALS                 | N/A        | 3.7                      | Weakness in the right upper limb        |
| sALS4 | Sporadic ALS                 | N/A        | 2.6                      | Weakness in the right upper limb        |
| C1    | Multiple cerebral infarction | N/A        | N/A                      | N/A                                     |
| C2    | AL amyloidosis               | N/A        | N/A                      | N/A                                     |
| C3    | Myotonic dystrophy           | N/A        | N/A                      | N/A                                     |
