# Supplementary material for: Immunochemical characterization on pathological oligomers of mutant Cu/Zn-superoxide dismutase in amyotrophic lateral sclerosis
Source: Springer Nature journal article supplement (doi:10.1186/s13024-016-0145-9), 2017-01-05

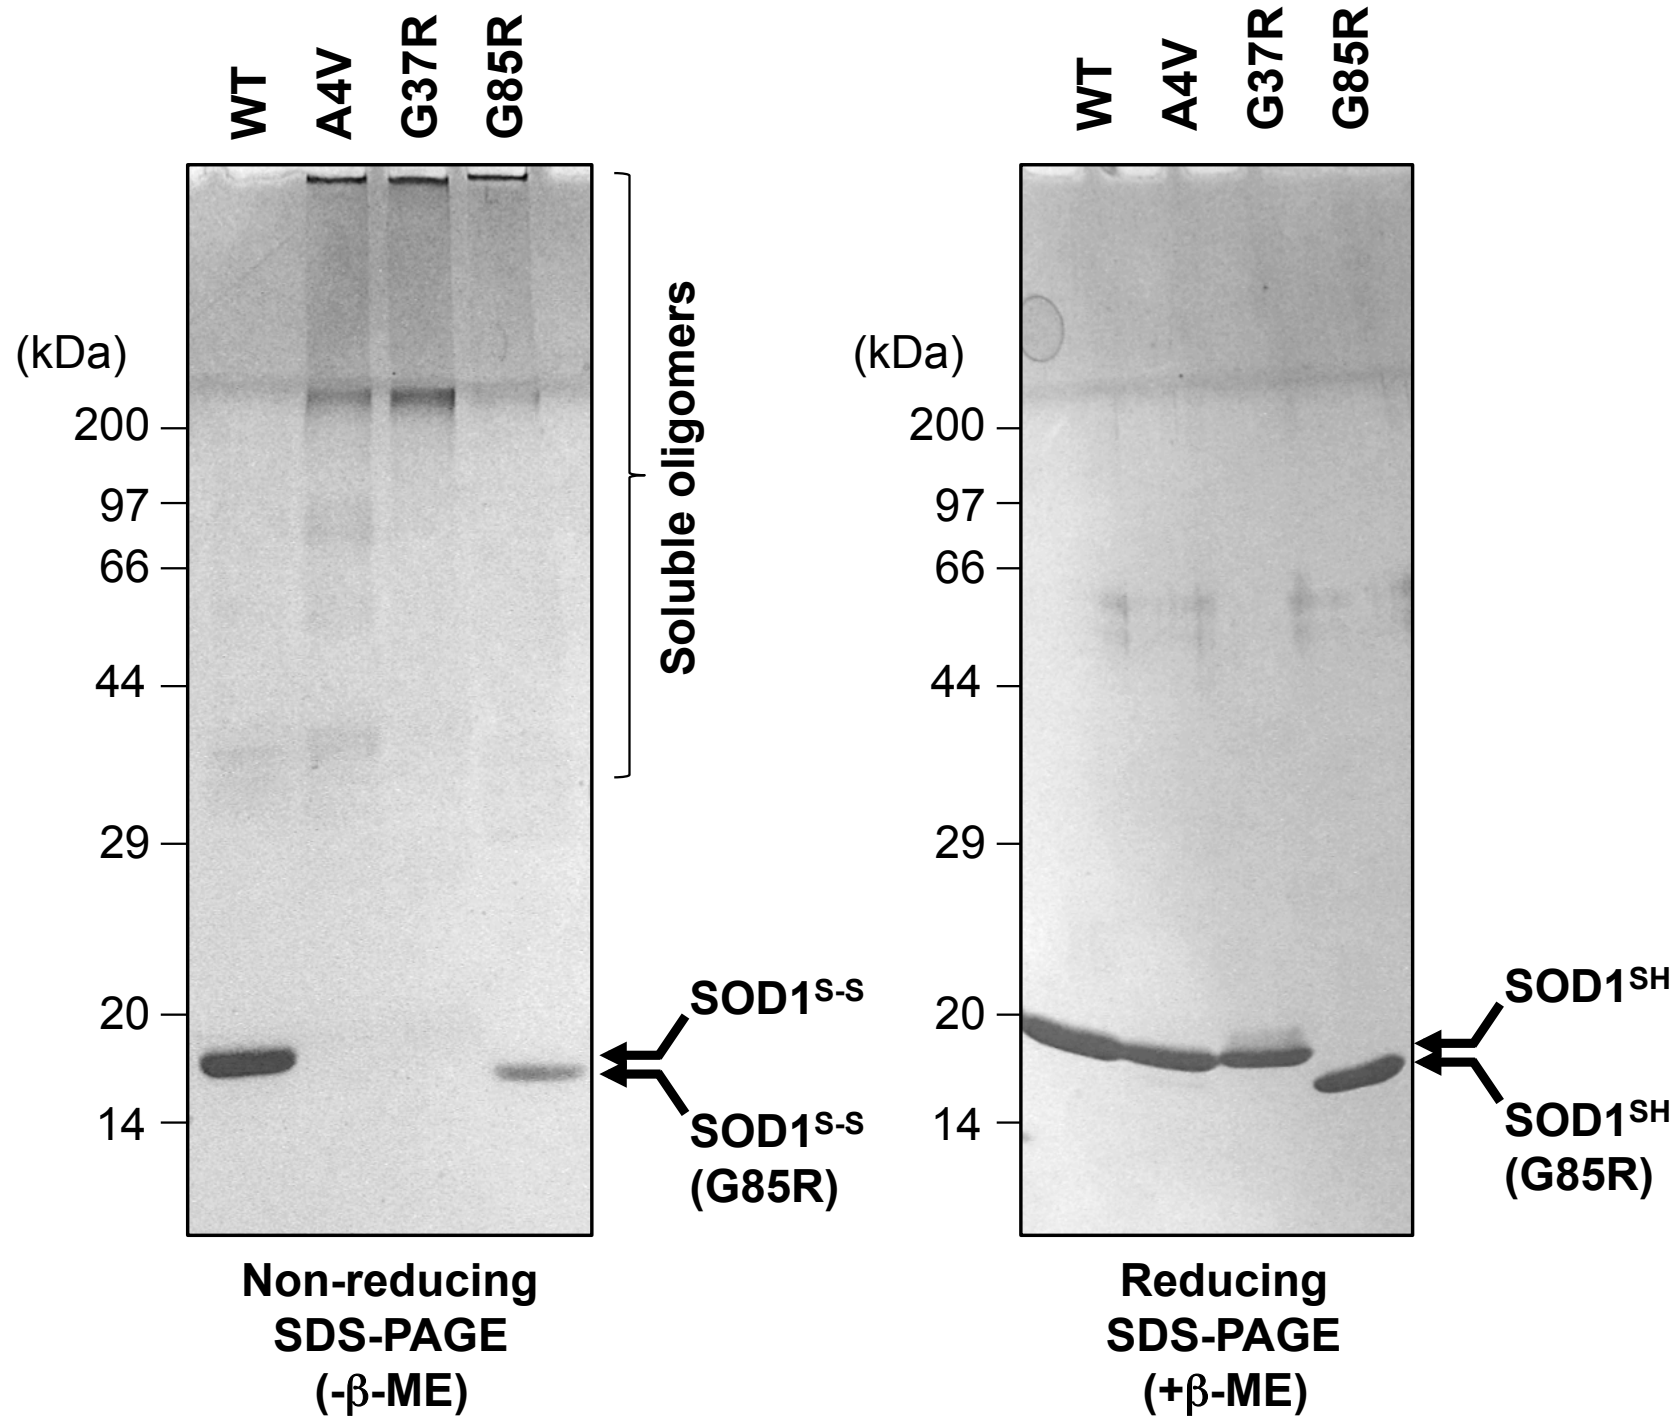

Supplement: MOESM2 [file 11981900]
