# Supplementary material for: Immunochemical characterization on pathological oligomers of mutant Cu/Zn-superoxide dismutase in amyotrophic lateral sclerosis
Source: Springer Nature journal article supplement (doi:10.1186/s13024-016-0145-9), 2017-01-05
Supplement: MOESM11 [file 11981900]

(A) anti-SOD1<sup>int</sup>

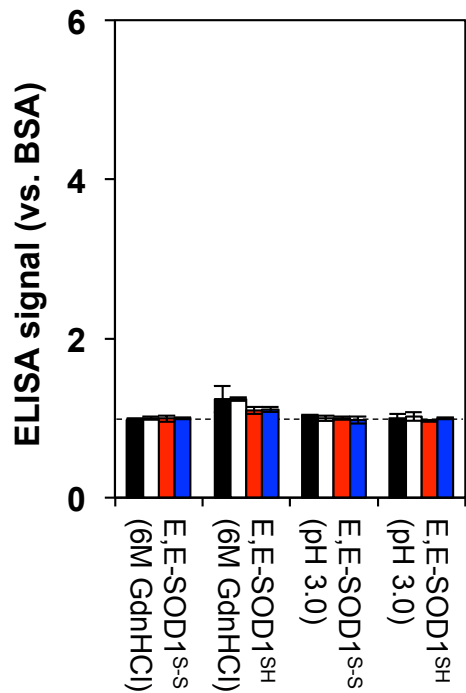

(B) USOD-like

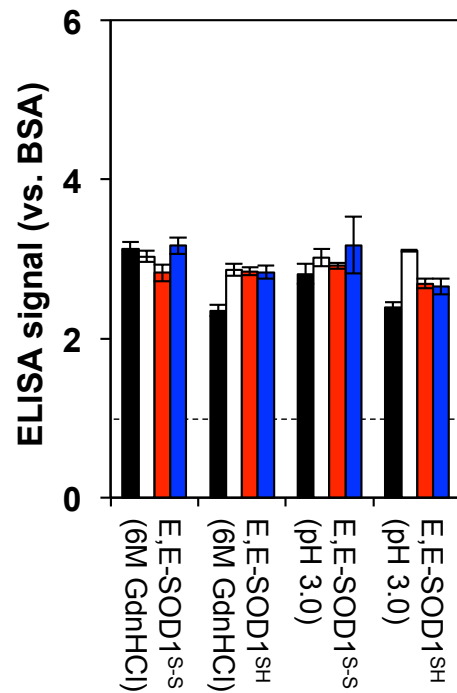

(C) SEDI-like

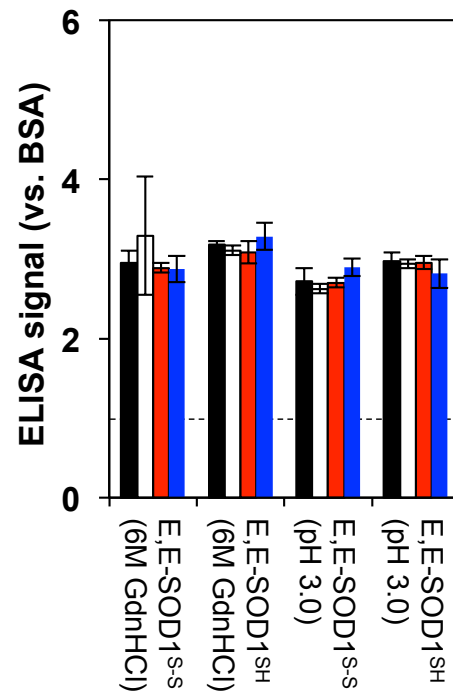

(D) anti-SOD1 (FL-154)

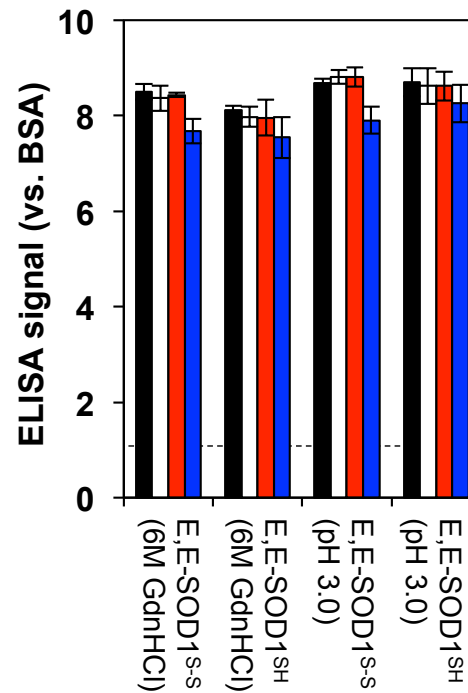

■ WT   □ A4V   ■ G37R   ■ G85R
